# Supplementary material for: A novel UGGT1 and p97-dependent checkpoint for native ectodomains with ionizable intramembrane residue
Source: PubMed Central journal article supplement — Mol Biol Cell. 2015 Apr 15;26(8):1532–42. doi: 10.1091/mbc.E14-12-1615 (PMC4395132; doi:10.1091/mbc.e14-12-1615), 2015-04-15
Supplement: supp_E14-12-1615v1_CombinedSupMats.pdf [file supp_E14-12-1615v1_CombinedSupMats.pdf]

# Supplemental Materials

*Molecular Biology of the Cell*

Merulla et al.

**Fig. S1**

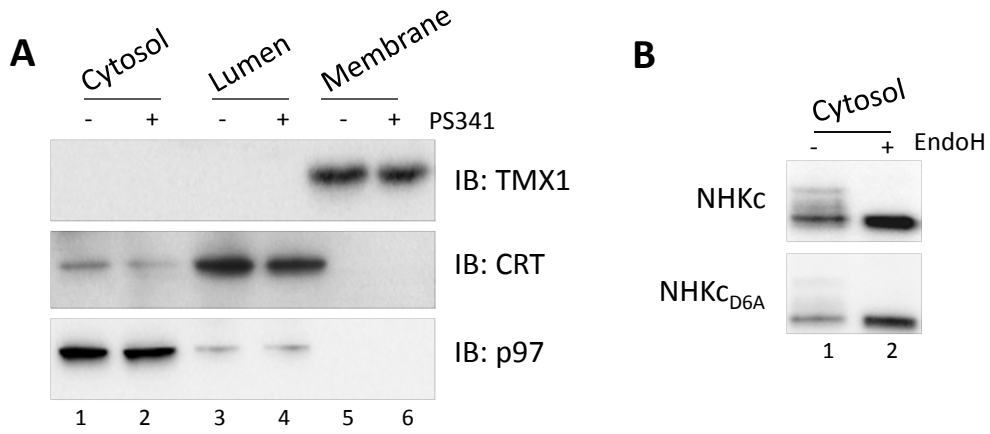

**Fig. S2**

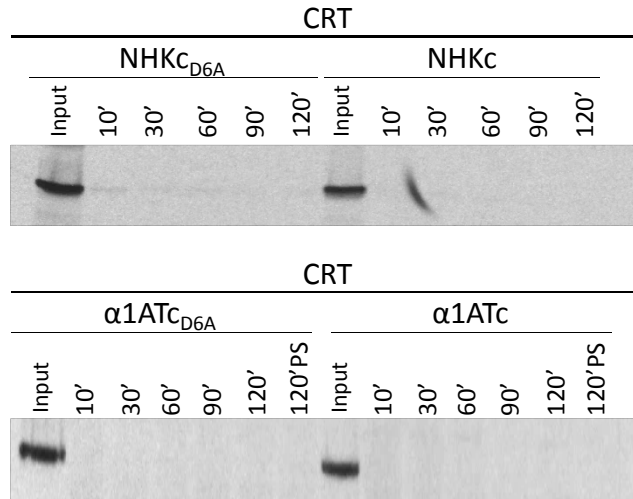

**Fig. S3**

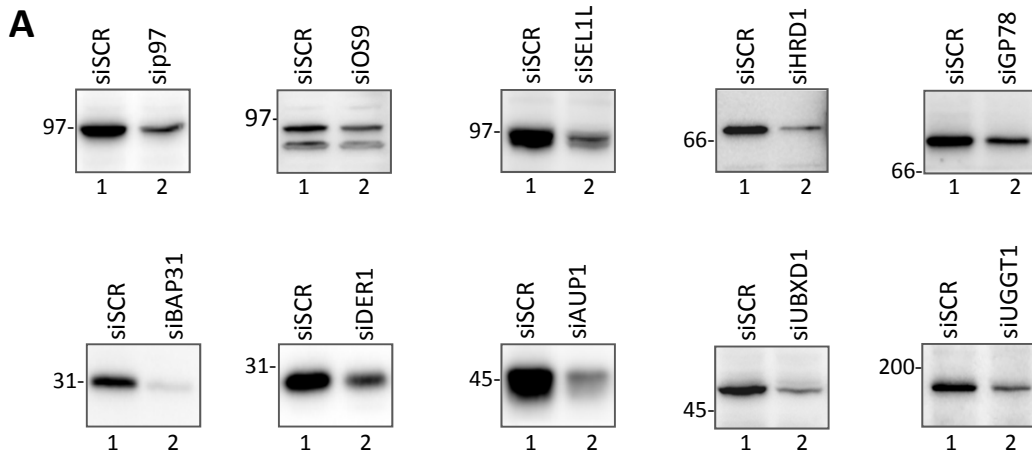

**B**

| PROTEIN | siRNA sequence        |
|---------|-----------------------|
| UGGT1   | GGUCAUUGCUACGACAUCAtt |
| p97     | GGCUCGUGGAGGUAACAUUtt |
| OS-9    | CAUCAUCCAGGAGACAGAGtt |
| SEL1L   | GGCUAUACUGUGGCUAGAAtt |
| HRD1    | CCAGCAUCCCUAGCUCAGAtt |
| GP78    | GACGGAUUCAAGUACCUUUtt |
| BAP31   | UGGUGACUCUCAUUUCGCAtt |
| DER1    | CGUUAGCAAUGGAUAUGCAtt |
| AUP1    | CCAACCAUGUGACACCUUUtt |
| UBXD1   | GAGAAGUACCGGAAGAUCAtt |

## Supplementary Figures

**Fig. S1**(A)Separation of cytosolic (lanes 1, mock-treated cells and 2, PS341-treated cells, p97 as marker), luminal (lanes 3 and 4, calreticulin (CRT) as marker)and membrane fractions (lanes 5 and 6, TMX1 as marker).(B) EndoH-treatment of cytosolic NHKc (upper panel) or NHK<sub>D6A</sub> (lower panel).

**Fig. S2**Same as **Figs. 4C-4D, 4F-4G** for CRT. CRT and associated polypeptides have been immunoisolated from cell lysates, the immunocomplexes have been dissociated before immunoisolation of the radiolabeled chimeras. Only NHK<sub>D6A</sub> weakly associates with the lectin chaperone.

**Fig. S3** (A)Efficiency control for the RNA interferences performed in this study. (B) Sequences of the siRNAs used for silencing the selected gene products.
